# Supplementary material for: The Performance and Mechanism of Sludge Reduction by the Bioaugmentation Approach
Source: MDPI journal article supplement (doi:10.3390/life12101649), 2022-10-20

## *Supplemental Materials*

# **The Performance and Mechanism of Sludge Reduction by the Bioaugmentation Approach**

Jiangwei Li <sup>1†</sup>, Xiaoyong Yang <sup>2†</sup>, Anyi Hu <sup>1</sup>, Yan Li <sup>3</sup>, Yeyun Li <sup>1,5</sup>, Lijun Fu<sup>4</sup> and Chang-Ping Yu<sup>1,6,\*</sup>

<sup>1</sup> CAS Key Laboratory of Urban Pollutant Conversion, Fujian Key Laboratory of Watershed Ecology, Institute of Urban Environment, Chinese Academy of Sciences, Xiamen 361021, China

<sup>2</sup> School of Environmental and Material Engineering, Yantai University, 30 Qingquan Road, Yantai 264005, China

<sup>3</sup> School of Ecological Environment and Urban Construction, Fujian University of Technology, Fuzhou 350118, China

<sup>4</sup> School of Petrochemical Engineering, Fujian Provincial Key Laboratory of Ecology-Toxicological Effects & Control for Emerging Contaminants, Putian, 351100, Fujian, China

<sup>5</sup> Lanzhou University of Technology, Lanzhou, 730000, China

<sup>6</sup> Water Innovation, Low Carbon and Environmental Sustainability Research Center, National Taiwan University, Taipei, 106, Taiwan

\* Correspondence: cpyu@ntu.edu.tw

† These authors contributed equally to this work

**Table S1.** Variation of sludge properties during the reduction process by pure culture.

|         | Blank                             | WAS-UT2  | WAS-3-5-1 | WAS-3-10-2 | Blank           | WAS-UT2 | WAS-3-5-1 | WAS-3-10-2 |
|---------|-----------------------------------|----------|-----------|------------|-----------------|---------|-----------|------------|
| Time(h) | Mean of Reduction rate of TSS (%) |          |           |            | Std. Error Mean |         |           |            |
| 24      | 3.63636                           | 12.93189 | 7.97546   | 15.86345   | 0.9             | 1.02    | 1.1       | 0.87       |
| 48      | 16.36364                          | 19.44719 | 13.08793  | 18.07229   | 1.4             | 1       | 0.8       | 1.3        |
| 72      | 11.31313                          | 16.78184 | 17.17791  | 22.69076   | 1               | 1.2     | 0.89      | 1.2        |
| 96      | 7.47475                           | 18.55874 | 17.79141  | 18.07229   | 1.3             | 1.3     | 1.2       | 0.8        |
| 120     | 24.54545                          | 26.25864 | 26.68712  | 21.88755   | 0.8             | 0.9     | 1.3       | 1          |
|         | Mean of TN content (mg/L)         |          |           |            | Std. Error Mean |         |           |            |
| 0       | 9.845                             | 10.67333 | 10.68667  | 9.93333    | 0.2             | 0.24    | 0.12      | 0.23       |
| 24      | 11.19833                          | 11.15833 | 10.65     | 12.1       | 0.21            | 0.2     | 0.11      | 0.25       |
| 48      | 13.84667                          | 14       | 13.09667  | 14.42167   | 0.18            | 0.21    | 0.18      | 0.2        |
| 72      | 17.8425                           | 15.375   | 19.165    | 14.93833   | 0.12            | 0.3     | 0.2       | 0.24       |
| 96      | 16.7                              | 13.5475  | 17.23333  | 12.77833   | 0.14            | 0.23    | 0.23      | 0.27       |
| 120     | 15.17167                          | 9.9775   | 16.505    | 11.79667   | 0.2             | 0.2     | 0.22      | 0.2        |
|         | Mean of TP content (mg/L)         |          |           |            | Std. Error Mean |         |           |            |
| 0       | 9.46458                           | 5.76949  | 11.80228  | 9.27605    | 0.24            | 0.24    | 0.32      | 0.32       |
| 24      | 14.32852                          | 16.52379 | 14.36623  | 15.19574   | 0.23            | 0.3     | 0.33      | 0.35       |
| 48      | 12.78262                          | 18.53891 | 16.40229  | 13.62469   | 0.28            | 0.31    | 0.38      | 0.3        |
| 72      | 9.30119                           | 18.66459 | 13.23508  | 15.74455   | 0.32            | 0.3     | 0.3       | 0.34       |
| 96      | 5.27932                           | 10.01758 | 12.08507  | 6.54244    | 0.34            | 0.34    | 0.33      | 0.37       |
| 120     | 8.48424                           | 8.8613   | 9.61539   | 4.50637    | 0.3             | 0.21    | 0.38      | 0.3        |
|         | Mean of SCOD content (mg/L)       |          |           |            | Std. Error Mean |         |           |            |
| 0       | 29.655                            | 33.565   | 30.775    | 29.28833   | 0.8             | 1       | 1.2       | 1.1        |
| 24      | 15.685                            | 17.58667 | 10.92     | 19.48333   | 0.9             | 1.02    | 1.1       | 0.87       |
| 48      | 12.20333                          | 15.0325  | 13.87167  | 15.66167   | 0.8             | 1       | 0.8       | 0.9        |
| 72      | 8.63667                           | 14.89    | 10.27833  | 12.075     | 1               | 1.2     | 0.89      | 1.2        |
| 96      | 7.70667                           | 12.2075  | 9.03667   | 9.49833    | 1.2             | 0.7     | 1.2       | 0.8        |
| 120     | 8.71                              | 9.495    | 6.59      | 7.395      | 0.8             | 0.9     | 0.9       | 1          |

**Table S2.** Results of Paired Samples Test between pure culture at the 0.05 level.

|                      | Paired Samples Test (At the 0.05 level) |    |         |          |    |          |          |    |           |                       |    |          |
|----------------------|-----------------------------------------|----|---------|----------|----|----------|----------|----|-----------|-----------------------|----|----------|
|                      | TN                                      |    |         | TP       |    |          | SCOD     |    |           | Reduction rate of TSS |    |          |
| Pair                 | t                                       | DF | p       | t        | DF | p        | t        | DF | p         | t                     | DF | p        |
| Blank—<br>WAS-3-5-1  | 1.22618                                 | 5  | 0.27472 | -3.05804 | 5  | 0.02816* | 0.17239  | 5  | 0.86989   | -1.66975              | 5  | 0.15584  |
| Blank—<br>WAS-UT2    | 1.71942                                 | 5  | 0.14617 | -1.68215 | 5  | 0.15337  | -4.22463 | 5  | 0.00829** | -2.86876              | 5  | 0.03505* |
| Blank—<br>WAS-3-10-2 | 1.61168                                 | 5  | 0.16795 | -0.64127 | 5  | 0.54958  | -2.02076 | 5  | 0.09927   | -2.06092              | 5  | 0.09432  |

\* significantly ( $p < 0.05$ );\*\* extremely significantly ( $p < 0.01$ );

**Table S3.** Variation of sludge properties during the reduction process by mixed culture.

|         | Blank                              | UT2+3-<br>5-1 | 3-5-1+3-<br>10-2 | UT2+3-<br>10-2 | UT2+3-5-<br>1+3-10-2 | Blank           | UT2+3<br>-5-1 | 3-5-<br>1+3-10-<br>2 | UT2+3<br>-10-2 | UT2+3-5-<br>1+3-10-2 |
|---------|------------------------------------|---------------|------------------|----------------|----------------------|-----------------|---------------|----------------------|----------------|----------------------|
| Time(h) | Mean of Reduction rate of TSS (%)  |               |                  |                |                      | Std. Error Mean |               |                      |                |                      |
| 12      | 7.32                               | 11.62         | 11.90            | 12.70          | 15.23                | 0.39            | 0.3           | 0.33                 | 0.32           | 0.35                 |
| 24      | 1.33                               | 7.44          | 5.03             | 7.33           | 8.65                 | 0.28            | 0.31          | 0.38                 | 0.31           | 0.3                  |
| 36      | 7.99                               | 9.01          | 8.20             | 11.39          | 12.52                | 0.32            | 0.3           | 0.3                  | 0.33           | 0.34                 |
| 48      | 7.06                               | 9.14          | 7.41             | 7.46           | 8.52                 | 0.34            | 0.34          | 0.33                 | 0.34           | 0.37                 |
| 72      | 7.32                               | 11.75         | 7.54             | 12.57          | 8.00                 | 0.3             | 0.4           | 0.38                 | 0.35           | 0.3                  |
| 96      | 7.59                               | 11.49         | 9.13             | 9.95           | 8.39                 | 0.29            | 0.33          | 0.3                  | 0.288          | 0.39                 |
|         | Mean of Reduction rate of VSS (%)  |               |                  |                |                      | Std. Error Mean |               |                      |                |                      |
| 12      | 8.90585                            | 12.5          | 9.89848          | 13.81074       | 21.71838             | 0.49            | 0.5           | 0.44                 | 0.39           | 0.53                 |
| 24      | 5.85242                            | 9.63542       | 7.1066           | 9.20716        | 11.69451             | 0.41            | 0.6           | 0.48                 | 0.41           | 0.6                  |
| 36      | 12.9771                            | 9.89583       | 14.97462         | 19.43734       | 20.04773             | 0.43            | 0.4           | 0.5                  | 0.43           | 0.54                 |
| 48      | 11.45038                           | 7.29167       | 11.16751         | 8.69565        | 15.0358              | 0.48            | 0.41          | 0.55                 | 0.48           | 0.57                 |
| 72      | 9.41476                            | 9.63542       | 9.64467          | 15.34527       | 15.75179             | 0.56            | 0.43          | 0.45                 | 0.61           | 0.5                  |
| 96      | 12.21374                           | 7.55208       | 11.16751         | 12.27621       | 15.0358              | 0.59            | 0.55          | 0.53                 | 0.55           | 0.59                 |
|         | Mean of Reduction rate of SCOD (%) |               |                  |                |                      | Std. Error Mean |               |                      |                |                      |
| 12      | 40.53532                           | 47.30898      | 53.41828         | 40.20742       | 20.79566             | 1.45            | 2             | 1.2                  | 1.39           | 1.53                 |
| 24      | 24.32395                           | 49.86265      | 34.19391         | 31.75764       | 27.83419             | 1.42            | 1.5           | 2.1                  | 1.41           | 1.6                  |
| 36      | 17.28753                           | 28.74148      | 41.85042         | 41.33188       | 46.66852             | 1.43            | 1.22          | 1.4                  | 1.43           | 1.54                 |
| 48      | 40.49393                           | 46.61715      | 46.89197         | 43.79913       | 33.13395             | 1.4             | 1.3           | 1.5                  | 1.48           | 1.57                 |
|         | Mean of Reduction rate of TN (%)   |               |                  |                |                      | Std. Error Mean |               |                      |                |                      |
| 12      | 39.47695                           | 46.9812       | 50.64776         | 38.27398       | 21.4108              | 1.45            | 2             | 1.2                  | 1.39           | 1.53                 |
| 24      | 24.34308                           | 50.79537      | 33.15312         | 31.293         | 28.85046             | 1.7             | 1.5           | 2.1                  | 1.41           | 1.6                  |
| 36      | 20.31482                           | 30.05242      | 39.3349          | 38.76973       | 43.87907             | 1.43            | 1.22          | 1.4                  | 1.43           | 1.8                  |
| 48      | 23.71096                           | 43.58279      | 38.11078         | 37.82881       | 30.61707             | 1.4             | 1.3           | 1.5                  | 1.48           | 1.57                 |
| 72      | 12.24591                           | 28.36226      | 24.65572         | 16.86564       | 10.06469             | 2.1             | 1             | 1.2                  | 1.8            | 1.2                  |

**Table S4.** Results of Paired Samples Test between mixed cultures at the 0.05 level.

| Pair                           | Paired Samples Test (At the 0.05 level) |    |           |                       |    |          |                        |    |         |                      |    |           |
|--------------------------------|-----------------------------------------|----|-----------|-----------------------|----|----------|------------------------|----|---------|----------------------|----|-----------|
|                                | Reduction rate of TSS                   |    |           | Reduction rate of VSS |    |          | Reduction rate of SCOD |    |         | Reduction rate of TN |    |           |
| Pair                           | t                                       | DF | p         | t                     | DF | p        | t                      | DF | p       | t                    | DF | p         |
| Blank—<br>UT2+3-5-             | -3.82878                                | 6  | 0.00867** | 0.46588               | 6  | 0.65774  | -2.32295               | 4  | 0.08087 | -3.43942             | 5  | 0.01845*  |
| Blank—3-5-<br>1+3-10-2         | -2.13004                                | 6  | 0.07721   | -1.15437              | 6  | 0.29225  | -2.6422                | 4  | 0.05745 | -4.20943             | 5  | 0.00841** |
| Blank—<br>UT2+3-10-2           | -3.538                                  | 6  | 0.01225*  | -1.93614              | 6  | 0.10098  | -1.5276                | 4  | 0.20133 | -2.24932             | 5  | 0.07434   |
| Blank—<br>UT2+3-5-1+3-<br>10-2 | -2.58025                                | 6  | 0.04176*  | -3.60063              | 6  | 0.01136* | -0.14298               | 4  | 0.89322 | -0.44375             | 5  | 0.67577   |
| Pure—Mixed                     | 5.09411                                 | 2  | 0.03644*  |                       |    |          |                        |    |         |                      |    |           |

\* significantly ( $p < 0.05$ );\* extremely significantly ( $p < 0.01$ );

**Figure S1.** The neighbor-joining phylogenetic tree of WAS-3-5-1 and reference strains (bootstrap was 1000), with *Timonella senegalensis* JC301<sup>T</sup> as outgroup.

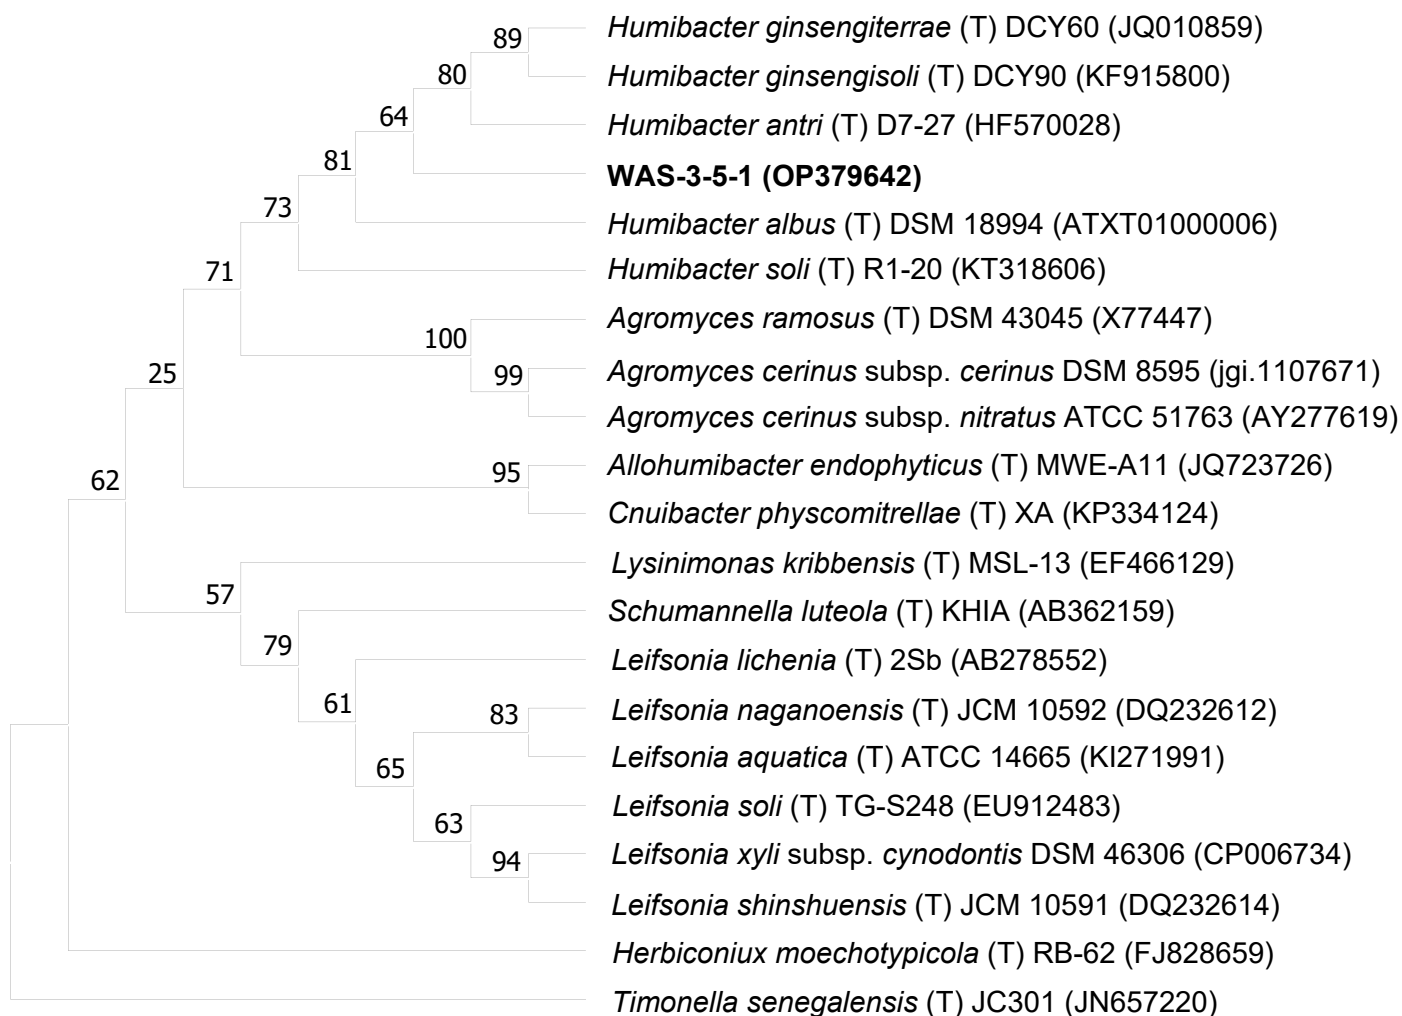

**Figure S2.** The neighbor-joining phylogenetic tree of WAS-UT2 and reference strains (bootstrap was 1000), with *Thermolongibacillus kozakliensis* E173a<sup>T</sup> as outgroup.

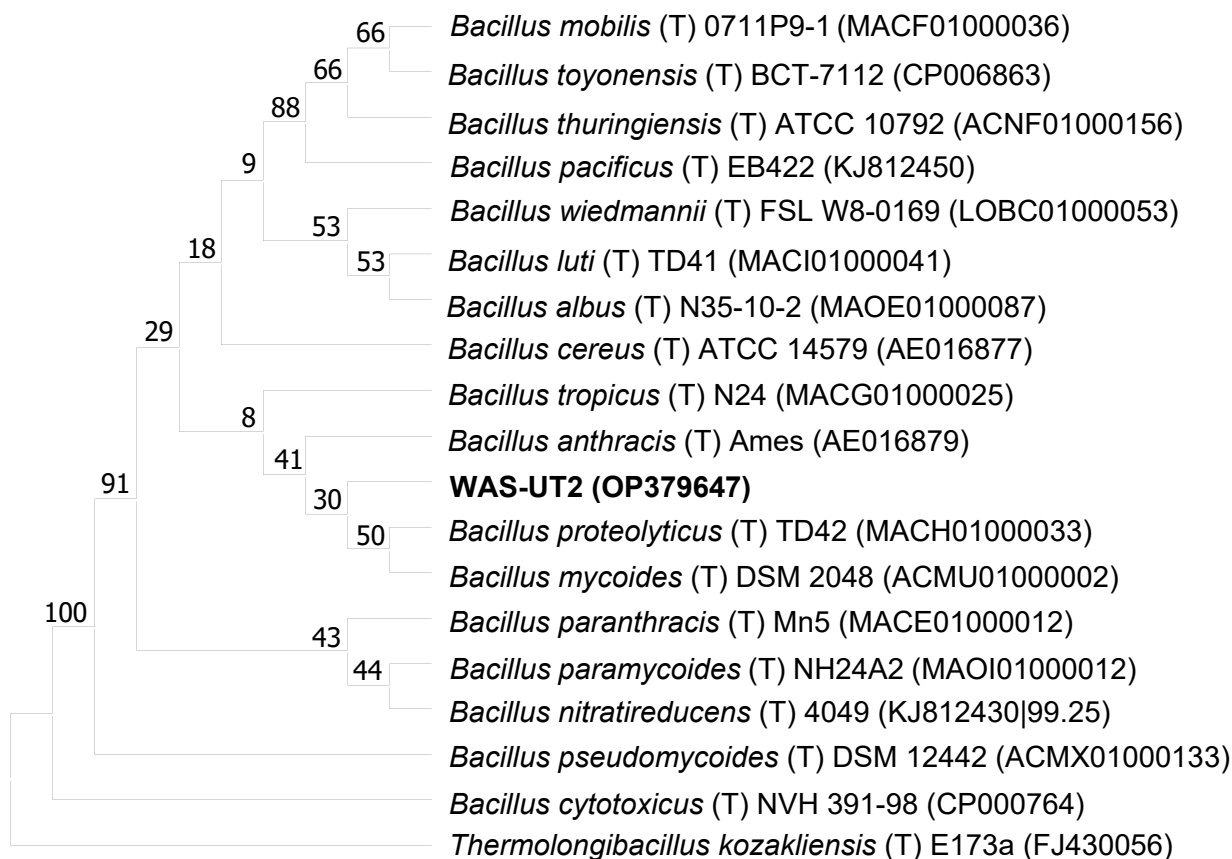

**Figure S3.** The neighbor-joining phylogenetic tree of WAS-3-10-2 and reference strains (bootstrap was 1000), with *Zymomonas mobilis* ATCC10988<sup>T</sup> and ATCC 29192<sup>T</sup> as outgroup.



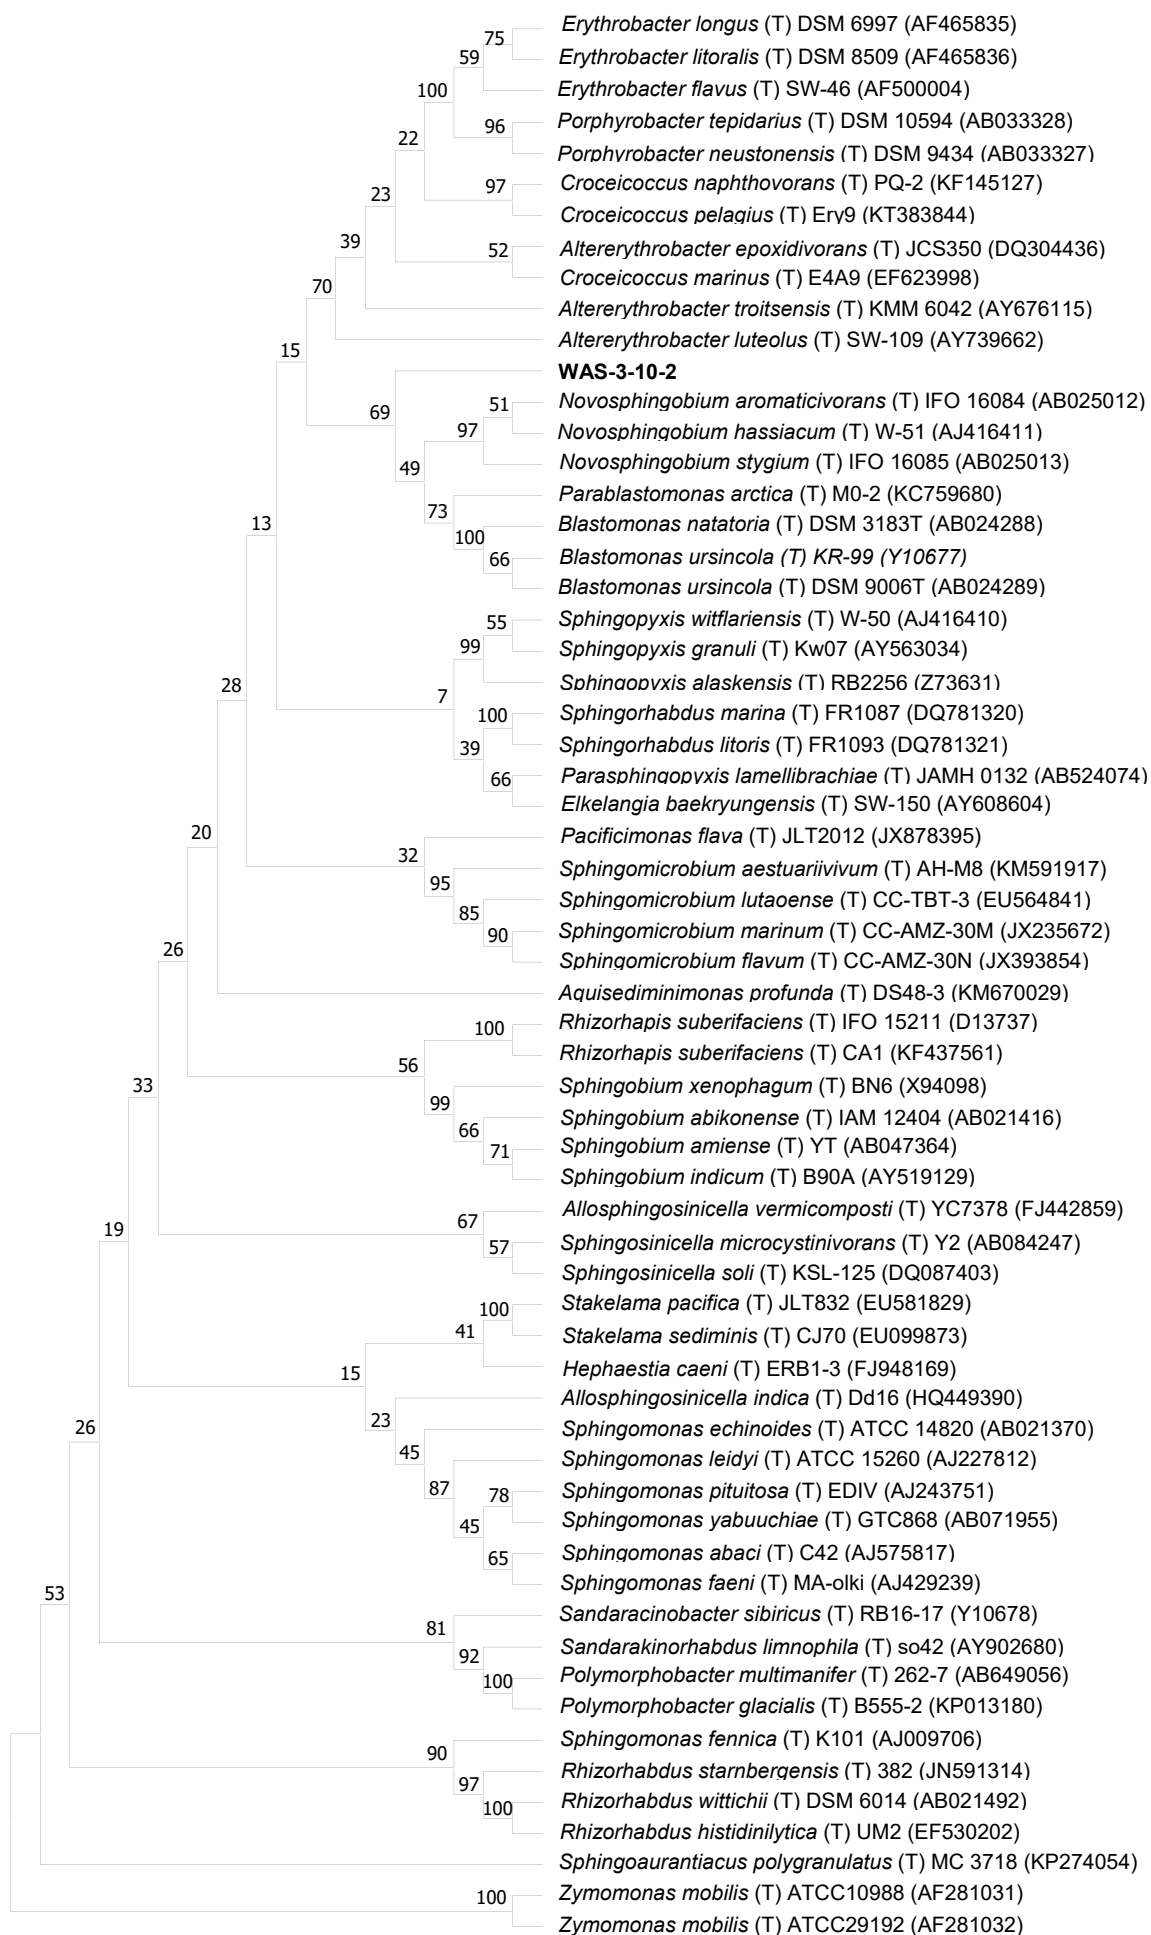

Supplement: s1 [file s1]
